# Supplementary material for: Evaluation of bioabsorbable calcium sulfate hemihydrate beads for local delivery of carboplatin
Source: PLoS One. 2020 Nov 5;15(11):e0241718. doi: 10.1371/journal.pone.0241718 (PMC7644016; doi:10.1371/journal.pone.0241718)
Supplement: S1 Data — (XLSX) [file pone.0241718.s001.xlsx]

## Sheet: Sheet1
Type	Bead_Size	Group	Hour	Dose	Peak_Hgt	ug_ml	Amt_Released_mg	Pct_Released
Powder	3	A	0	0	nd	0	0
Powder	3	A	0	20	1.9E-2	0.01	0.002	0.0002
Powder	3	A	0	50	nd	0	0	0
Powder	3	A	0	100	nd	0	0	0
Powder	3	A	1	0	.28	0.08	0.016
Powder	3	A	1	20	20.3	6	1.2	0.12
Powder	3	A	1	50	55.9	16.6	3.32	0.1328
Powder	3	A	1	100	71	21.1	4.22	0.0844
Powder	3	A	2	0	nd	0	0
Powder	3	A	2	20	37.2	11.1	2.22	0.222
Powder	3	A	2	50	147.2	43.8	8.76	0.3504
Powder	3	A	2	100	86.9	25.8	5.16	0.1032
Powder	3	A	3	0	nd	0	0
Powder	3	A	3	20	35.9	10.7	2.14	0.214
Powder	3	A	3	50	127.3	37.9	7.58	0.3032
Powder	3	A	3	100	303.5	90.3	18.06	0.3612
Powder	3	A	6	0	nd	0	0
Powder	3	A	6	20	58.4	17.4	3.48	0.348
Powder	3	A	6	50	200	59.5	11.9	0.476
Powder	3	A	6	100	177.4	52.8	10.56	0.2112
Powder	3	A	9	0	nd	0	0
Powder	3	A	9	20	55.7	16.6	3.32	0.332
Powder	3	A	9	50	214.4	63.8	12.76	0.5104
Powder	3	A	9	100	236	70.2	14.04	0.2808
Powder	3	A	12	0	nd	0	0
Powder	3	A	12	20	62.6	18.6	3.72	0.372
Powder	3	A	12	50	215.8	64.2	12.84	0.5136
Powder	3	A	12	100	299.8	89.2	17.84	0.3568
Powder	3	A	24	0	nd	0	0
Powder	3	A	24	20	73.7	21.9	4.38	0.438
Powder	3	A	24	50	277.6	82.6	16.52	0.6608
Powder	3	A	24	100	434.6	129.3	25.86	0.5172
Powder	3	A	36	0	nd	0	0
Powder	3	A	36	20	77.2	23	4.6	0.46
Powder	3	A	36	50	265.6	79	15.8	0.632
Powder	3	A	36	100	569.5	169.4	33.88	0.6776
Powder	3	A	48	0	nd	0	0
Powder	3	A	48	20	87.8	26.1	5.22	0.522
Powder	3	A	48	50	285.5	84.9	16.98	0.6792
Powder	3	A	48	100	549	163.3	32.66	0.6532
Powder	3	A	72	0	nd	0	0
Powder	3	A	72	20	78.5	23.4	4.68	0.468
Powder	3	A	72	50	271.4	80.7	16.14	0.6456
Powder	3	A	72	100	525	156.2	31.24	0.6248
Powder	5	A	0	0	nd	0	0
Powder	5	A	0	20	nd	0	0	0
Powder	5	A	0	50	nd	0	0	0
Powder	5	A	0	100	nd	0	0	0
Powder	5	A	1	0	nd	0	0
Powder	5	A	1	20	24	7.4	1.48	0.148
Powder	5	A	1	50	85.6	26.3	5.26	0.2104
Powder	5	A	1	100	61.9	19	3.8	0.076
Powder	5	A	2	0	nd	0	0
Powder	5	A	2	20	46.4	14.2	2.84	0.284
Powder	5	A	2	50	151.4	46.4	9.28	0.3712
Powder	5	A	2	100	112.6	34.5	6.9	0.138
Powder	5	A	3	0	nd	0	0
Powder	5	A	3	20	48.2	14.8	2.96	0.296
Powder	5	A	3	50	198.2	60.8	12.16	0.4864
Powder	5	A	3	100	112.1	34.4	6.88	0.1376
Powder	5	A	6	0	nd	0	0
Powder	5	A	6	20	59.1	18.1	3.62	0.362
Powder	5	A	6	50	164.3	50.4	10.08	0.4032
Powder	5	A	6	100	286.5	87.9	17.58	0.3516
Powder	5	A	9	0	nd	0	0
Powder	5	A	9	20	66.9	20.5	4.1	0.41
Powder	5	A	9	50	195.7	60	12	0.48
Powder	5	A	9	100	512.5	157.2	31.44	0.6288
Powder	5	A	12	0	nd	0	0
Powder	5	A	12	20	76	23.3	4.66	0.466
Powder	5	A	12	50	240.8	73.9	14.78	0.5912
Powder	5	A	12	100	525.6	161.2	32.24	0.6448
Powder	5	A	24	0	nd	0	0
Powder	5	A	24	20	81.7	25.1	5.02	0.502
Powder	5	A	24	50	234.2	71.8	14.36	0.5744
Powder	5	A	24	100	528.3	162.1	32.42	0.6484
Powder	5	A	36	0	no vial	0	0
Powder	5	A	36	20	89.1	27.3	5.46	0.546
Powder	5	A	36	50	236.6	72.6	14.52	0.5808
Powder	5	A	36	100	569.3	174.6	34.92	0.6984
Powder	5	A	48	0	nd	0	0
Powder	5	A	48	20	89.7	27.5	5.5	0.55
Powder	5	A	48	50	287	88	17.6	0.704
Powder	5	A	48	100	652.3	200.1	40.02	0.8004
Powder	5	A	72	0	nd	0	0
Powder	5	A	72	20	90.4	27.7	5.54	0.554
Powder	5	A	72	50	282.6	86.7	17.34	0.6936
Powder	5	A	72	100	616	189	37.8	0.756
Powder	3	B	0	0	nd	0	0
Powder	3	B	0	20	nd	0	0	0
Powder	3	B	0	50	nd	0	0	0
Powder	3	B	0	100	nd	0	0	0
Powder	3	B	1	0	nd	0	0
Powder	3	B	1	20	18.3	5.4	1.08	0.108
Powder	3	B	1	50	106.5	32	6.4	0.256
Powder	3	B	1	100	70.5	21.1	4.22	0.0844
Powder	3	B	2	0	nd	0	0
Powder	3	B	2	20	25.8	7.6	1.52	0.152
Powder	3	B	2	50	58.4	17.5	3.5	0.14
Powder	3	B	2	100	184.4	55.5	11.1	0.222
Powder	3	B	3	0	nd	0	0
Powder	3	B	3	20	49.8	14.9	2.98	0.298
Powder	3	B	3	50	74.3	22.3	4.46	0.1784
Powder	3	B	3	100	235.6	70.9	14.18	0.2836
Powder	3	B	6	0	nd	0	0
Powder	3	B	6	20	56.4	16.9	3.38	0.338
Powder	3	B	6	50	182.8	55	11	0.44
Powder	3	B	6	100	298	89.8	17.96	0.3592
Powder	3	B	9	0	nd	0	0
Powder	3	B	9	20	66.8	20	4	0.4
Powder	3	B	9	50	180	54.2	10.84	0.4336
Powder	3	B	9	100	332	100	20	0.4
Powder	3	B	12	0	nd	0	0
Powder	3	B	12	20	69.5	20.8	4.16	0.416
Powder	3	B	12	50	169.7	51	10.2	0.408
Powder	3	B	12	100	358.8	108.1	21.62	0.4324
Powder	3	B	24	0	nd	0	0
Powder	3	B	24	20	74.3	22.3	4.46	0.446
Powder	3	B	24	50	208.2	62.7	12.54	0.5016
Powder	3	B	24	100	349.4	105.3	21.06	0.4212
Powder	3	B	36	0	nd	0	0
Powder	3	B	36	20	75.1	22.5	4.5	0.45
Powder	3	B	36	50	202.1	60.8	12.16	0.4864
Powder	3	B	36	100	420.1	126.6	25.32	0.5064
Powder	3	B	48	0	nd	0	0
Powder	3	B	48	20	81.6	24.5	4.9	0.49
Powder	3	B	48	50	204.1	61.4	12.28	0.4912
Powder	3	B	48	100	447.4	134.8	26.96	0.5392
Powder	3	B	72	0	nd	0	0
Powder	3	B	72	20	77.4	23.2	4.64	0.464
Powder	3	B	72	50	207.3	62.4	12.48	0.4992
Powder	3	B	72	100	405.1	122.1	24.42	0.4884
Powder	5	B	0	0	nd	0	0
Powder	5	B	0	20	nd	0	0	0
Powder	5	B	0	50	nd	0	0	0
Powder	5	B	0	100	nd	0	0	0
Powder	5	B	1	0	nd	0	0
Powder	5	B	1	20	9.4	2.7	0.54	0.054
Powder	5	B	1	50	190.6	57.3	11.46	0.4584
Powder	5	B	1	100	66.2	19.8	3.96	0.0792
Powder	5	B	2	0	nd	0	0
Powder	5	B	2	20	18.6	5.4	1.08	0.108
Powder	5	B	2	50	122.8	36.9	7.38	0.2952
Powder	5	B	2	100	149.5	44.9	8.98	0.1796
Powder	5	B	3	0	nd	0	0
Powder	5	B	3	20	31.9	9.5	1.9	0.19
Powder	5	B	3	50	183.8	55.3	11.06	0.4424
Powder	5	B	3	100	200.7	60.4	12.08	0.2416
Powder	5	B	6	0	nd	0	0
Powder	5	B	6	20	32.1	9.5	1.9	0.19
Powder	5	B	6	50	137.6	41.4	8.28	0.3312
Powder	5	B	6	100	288.6	86.9	17.38	0.3476
Powder	5	B	9	0	nd	0	0
Powder	5	B	9	20	46.6	13.9	2.78	0.278
Powder	5	B	9	50	207	62.3	12.46	0.4984
Powder	5	B	9	100	351.4	105.9	21.18	0.4236
Powder	5	B	12	0	nd	0	0
Powder	5	B	12	20	49.7	14.8	2.96	0.296
Powder	5	B	12	50	198.6	59.8	11.96	0.4784
Powder	5	B	12	100	416	125.4	25.08	0.5016
Powder	5	B	24	0	nd	0	0
Powder	5	B	24	20	55.5	16.6	3.32	0.332
Powder	5	B	24	50	206.9	62.3	12.46	0.4984
Powder	5	B	24	100	514	154.9	30.98	0.6196
Powder	5	B	36	0	nd	0	0
Powder	5	B	36	20	62.9	18.8	3.76	0.376
Powder	5	B	36	50	212.1	63.8	12.76	0.5104
Powder	5	B	36	100	524.4	158.1	31.62	0.6324
Powder	5	B	48	0	nd	0	0
Powder	5	B	48	20	69.6	20.8	4.16	0.416
Powder	5	B	48	50	222.7	67	13.4	0.536
Powder	5	B	48	100	549.2	165.6	33.12	0.6624
Powder	5	B	72	0	nd	0	0
Powder	5	B	72	20	63	18.8	3.76	0.376
Powder	5	B	72	50	211.1	63.5	12.7	0.508
Powder	5	B	72	100	504.3	152	30.4	0.608
Powder	3	C	0	0	nd	0	0
Powder	3	C	0	20	nd	0	0	0
Powder	3	C	0	50	nd	0	0	0
Powder	3	C	0	100	nd	0	0	0
Powder	3	C	1	0	nd	0	0
Powder	3	C	1	20	54.5	17.1	3.42	0.342
Powder	3	C	1	50	80.2	25.3	5.06	0.2024
Powder	3	C	1	100	80.5	25.4	5.08	0.1016
Powder	3	C	2	0	nd	0	0
Powder	3	C	2	20	41.2	12.9	2.58	0.258
Powder	3	C	2	50	118.1	37.3	7.46	0.2984
Powder	3	C	2	100	197.4	62.4	12.48	0.2496
Powder	3	C	3	0	nd	0	0
Powder	3	C	3	20	74.6	23.5	4.7	0.47
Powder	3	C	3	50	166.5	52.6	10.52	0.4208
Powder	3	C	3	100	252.2	79.7	15.94	0.3188
Powder	3	C	6	0	nd	0	0
Powder	3	C	6	20	72.6	22.9	4.58	0.458
Powder	3	C	6	50	137.1	43.3	8.66	0.3464
Powder	3	C	6	100	464.3	146.9	29.38	0.5876
Powder	3	C	9	0	nd	0	0
Powder	3	C	9	20	83.1	26.2	5.24	0.524
Powder	3	C	9	50	161.1	50.9	10.18	0.4072
Powder	3	C	9	100	375.2	118.7	23.74	0.4748
Powder	3	C	12	0	nd	0	0
Powder	3	C	12	20	88.8	28	5.6	0.56
Powder	3	C	12	50	174.7	55.2	11.04	0.4416
Powder	3	C	12	100	463	146.5	29.3	0.586
Powder	3	C	24	0	nd	0	0
Powder	3	C	24	20	94.4	29.8	5.96	0.596
Powder	3	C	24	50	176.5	55.8	11.16	0.4464
Powder	3	C	24	100	475.5	150.4	30.08	0.6016
Powder	3	C	36	0	nd	0	0
Powder	3	C	36	20	97.7	30.8	6.16	0.616
Powder	3	C	36	50	177.6	56.1	11.22	0.4488
Powder	3	C	36	100	523.4	165.6	33.12	0.6624
Powder	3	C	48	0	nd	0	0
Powder	3	C	48	20	102.7	32.4	6.48	0.648
Powder	3	C	48	50	180.5	57	11.4	0.456
Powder	3	C	48	100	548.3	173.5	34.7	0.694
Powder	3	C	72	0	nd	0	0
Powder	3	C	72	20	99.8	31.5	6.3	0.63
Powder	3	C	72	50	170.2	53.8	10.76	0.4304
Powder	3	C	72	100	506.5	160.2	32.04	0.6408
Powder	5	C	0	0	nd	0	0
Powder	5	C	0	20	nd	0	0	0
Powder	5	C	0	50	nd	0	0	0
Powder	5	C	0	100	nd	0	0	0
Powder	5	C	1	0	nd	0	0
Powder	5	C	1	20	13.8	4.2	0.84	0.084
Powder	5	C	1	50	68.4	21.5	4.3	0.172
Powder	5	C	1	100	67.2	21.1	4.22	0.0844
Powder	5	C	2	0	nd	0	0
Powder	5	C	2	20	22.4	7	1.4	0.14
Powder	5	C	2	50	148.3	46.8	9.36	0.3744
Powder	5	C	2	100	106.1	33.5	6.7	0.134
Powder	5	C	3	0	nd	0	0
Powder	5	C	3	20	22.5	7	1.4	0.14
Powder	5	C	3	50	112.9	35.6	7.12	0.2848
Powder	5	C	3	100	207.3	65.5	13.1	0.262
Powder	5	C	6	0	nd	0	0
Powder	5	C	6	20	35.8	11.2	2.24	0.224
Powder	5	C	6	50	125	39.4	7.88	0.3152
Powder	5	C	6	100	280.2	88.6	17.72	0.3544
Powder	5	C	9	0	nd	0	0
Powder	5	C	9	20	35.7	11.2	2.24	0.224
Powder	5	C	9	50	152.2	48.1	9.62	0.3848
Powder	5	C	9	100	317.3	100.3	20.06	0.4012
Powder	5	C	12	0	nd	0	0
Powder	5	C	12	20	38.5	12.1	2.42	0.242
Powder	5	C	12	50	162.2	51.2	10.24	0.4096
Powder	5	C	12	100	360.3	113.9	22.78	0.4556
Powder	5	C	24	0	nd	0	0
Powder	5	C	24	20	40.1	12.6	2.52	0.252
Powder	5	C	24	50	181.2	57.2	11.44	0.4576
Powder	5	C	24	100	411.9	130.3	26.06	0.5212
Powder	5	C	36	0	nd	0	0
Powder	5	C	36	20	44.8	14.1	2.82	0.282
Powder	5	C	36	50	181.3	57.3	11.46	0.4584
Powder	5	C	36	100	423.2	133.9	26.78	0.5356
Powder	5	C	48	0	nd	0	0
Powder	5	C	48	20	47.4	14.9	2.98	0.298
Powder	5	C	48	50	195.5	61.8	12.36	0.4944
Powder	5	C	48	100	482.4	152.6	30.52	0.6104
Powder	5	C	72	0	nd	0	0
Powder	5	C	72	20	43.8	13.7	2.74	0.274
Powder	5	C	72	50	184.1	58.2	11.64	0.4656
Powder	5	C	72	100	486.4	153.9	30.78	0.6156
Powder	3	A	0	500	nd	0	0	0
Powder	3	A	1	500	586.1	207	41.4	0.1656
Powder	3	A	2	500	2422.7	857	171.4	0.6856
Powder	3	A	3	500	2132.8	754	150.8	0.6032
Powder	3	A	6	500	2946.4	1042	208.4	0.8336
Powder	3	A	9	500	2756.5	975	195	0.78
Powder	3	A	12	500	2685.4	950	190	0.76
Powder	3	A	24	500	2228.9	788	157.6	0.6304
Powder	3	A	36	500	2154.7	762	152.4	0.6096
Powder	3	A	48	500	1932.6	683	136.6	0.5464
Powder	3	A	72	500	1878.9	664	132.8	0.5312
Powder	5	A	0	500	nd	0	0	0
Powder	5	A	1	500	194	69	13.8	0.0552
Powder	5	A	2	500	1234.2	436	87.2	0.3488
Powder	5	A	3	500	1310.8	463	92.6	0.3704
Powder	5	A	6	500	1381.1	488	97.6	0.3904
Powder	5	A	9	500	1856.1	656	131.2	0.5248
Powder	5	A	12	500	2758.8	976	195.2	0.7808
Powder	5	A	24	500	2551.6	902	180.4	0.7216
Powder	5	A	36	500	2915.4	1031	206.2	0.8248
Powder	5	A	48	500	2907.6	1028	205.6	0.8224
Powder	5	A	72	500	2890.7	1022	204.4	0.8176
Powder	3	B	0	500	nd	0	0	0
Powder	3	B	1	500	506	188	37.6	0.1504
Powder	3	B	2	500	1106	412	82.4	0.3296
Powder	3	B	3	500	1355	505	101	0.404
Powder	3	B	6	500	2187	816	163.2	0.6528
Powder	3	B	9	500	2661.1	992	198.4	0.7936
Powder	3	B	12	500	2508.5	935	187	0.748
Powder	3	B	24	500	2243.8	837	167.4	0.6696
Powder	3	B	36	500	1541.5	575	115	0.46
Powder	3	B	48	500	1807.8	674	134.8	0.5392
Powder	3	B	72	500	1724.3	643	128.6	0.5144
Powder	5	B	0	500	nd	0	0	0
Powder	5	B	1	500	259	97	19.4	0.0776
Powder	5	B	2	500	1047.8	391	78.2	0.3128
Powder	5	B	3	500	1265.2	472	94.4	0.3776
Powder	5	B	6	500	1853.4	691	138.2	0.5528
Powder	5	B	9	500	2084.3	777	155.4	0.6216
Powder	5	B	12	500	2307.8	861	172.2	0.6888
Powder	5	B	24	500	1935.4	722	144.4	0.5776
Powder	5	B	36	500	1767	659	131.8	0.5272
Powder	5	B	48	500	1534.3	572	114.4	0.4576
Powder	5	B	72	500	1659.6	619	123.8	0.4952
Powder	3	C	0	500	nd	0	0	0
Powder	3	C	1	500	371.5	141	28.2	0.1128
Powder	3	C	2	500	1016.4	385	77	0.308
Powder	3	C	3	500	1246.2	472	94.4	0.3776
Powder	3	C	6	500	2600	986	197.2	0.7888
Powder	3	C	9	500	2655.6	1007	201.4	0.8056
Powder	3	C	12	500	2652.3	1006	201.2	0.8048
Powder	3	C	24	500	2411.8	914	182.8	0.7312
Powder	3	C	36	500	2046.5	776	155.2	0.6208
Powder	3	C	48	500	1859.4	705	141	0.564
Powder	3	C	72	500	1815.1	688	137.6	0.5504
Powder	5	C	0	500	nd	0	0	0
Powder	5	C	1	500	377.2	143	28.6	0.1144
Powder	5	C	2	500	837.8	318	63.6	0.2544
Powder	5	C	3	500	1180.7	448	89.6	0.3584
Powder	5	C	6	500	1686.8	640	128	0.512
Powder	5	C	9	500	2075.6	787	157.4	0.6296
Powder	5	C	12	500	1832.4	695	139	0.556
Powder	5	C	24	500	1135.1	430	86	0.344
Powder	5	C	36	500	1483.9	563	112.6	0.4504
Powder	5	C	48	500	1666	632	126.4	0.5056
Powder	5	C	72	500	1758.6	667	133.4	0.5336
Liquid	3	A	0	20	nd	0	0	0
Liquid	3	A	1	20	45	16	3.2	0.32
Liquid	3	A	2	20	77.2	27	5.4	0.54
Liquid	3	A	3	20	101.6	36	7.2	0.72
Liquid	3	A	6	20	106.2	38	7.6	0.76
Liquid	3	A	9	20	119.5	42	8.4	0.84
Liquid	3	A	12	20	112.3	40	8	0.8
Liquid	3	A	24	20	108.6	38	7.6	0.76
Liquid	3	A	36	20	105.6	37	7.4	0.74
Liquid	3	A	48	20	103.3	37	7.4	0.74
Liquid	3	A	72	20	97	34	6.8	0.68
Liquid	5	A	0	20	nd	0	0	0
Liquid	5	A	1	20	44.8	16	3.2	0.32
Liquid	5	A	2	20	88.3	31	6.2	0.62
Liquid	5	A	3	20	98.6	35	7	0.7
Liquid	5	A	6	20	115	41	8.2	0.82
Liquid	5	A	9	20	113.9	40	8	0.8
Liquid	5	A	12	20	116.7	41	8.2	0.82
Liquid	5	A	24	20	114.9	41	8.2	0.82
Liquid	5	A	36	20	111.2	39	7.8	0.78
Liquid	5	A	48	20	108.8	38	7.6	0.76
Liquid	5	A	72	20	103	36	7.2	0.72
Liquid	3	B	0	20	nd	0	0	0
Liquid	3	B	1	20	36.3	13	2.6	0.26
Liquid	3	B	2	20	66.9	25	5	0.5
Liquid	3	B	3	20	81.8	30	6	0.6
Liquid	3	B	6	20	91.4	34	6.8	0.68
Liquid	3	B	9	20	94.5	35	7	0.7
Liquid	3	B	12	20	96.4	36	7.2	0.72
Liquid	3	B	24	20	93.6	35	7	0.7
Liquid	3	B	36	20	89.8	33	6.6	0.66
Liquid	3	B	48	20	87.9	33	6.6	0.66
Liquid	3	B	72	20	83.4	31	6.2	0.62
Liquid	5	B	0	20	nd	0	0	0
Liquid	5	B	1	20	56.4	21	4.2	0.42
Liquid	5	B	2	20	81.8	30	6	0.6
Liquid	5	B	3	20	86.4	32	6.4	0.64
Liquid	5	B	6	20	96.7	36	7.2	0.72
Liquid	5	B	9	20	95.5	36	7.2	0.72
Liquid	5	B	12	20	104.8	39	7.8	0.78
Liquid	5	B	24	20	99.2	37	7.4	0.74
Liquid	5	B	36	20	98	36	7.2	0.72
Liquid	5	B	48	20	95.4	36	7.2	0.72
Liquid	5	B	72	20	90.2	34	6.8	0.68
Liquid	3	C	0	20	6.5	2	0.4	0.04
Liquid	3	C	1	20	36.6	14	2.8	0.28
Liquid	3	C	2	20	89	34	6.8	0.68
Liquid	3	C	3	20	92.6	35	7	0.7
Liquid	3	C	6	20	98	37	7.4	0.74
Liquid	3	C	9	20	99.9	38	7.6	0.76
Liquid	3	C	12	20	99.8	38	7.6	0.76
Liquid	3	C	24	20	97.5	37	7.4	0.74
Liquid	3	C	36	20	95	36	7.2	0.72
Liquid	3	C	48	20	91.7	35	7	0.7
Liquid	3	C	72	20	87	33	6.6	0.66
Liquid	5	C	0	20	nd	0	0	0
Liquid	5	C	1	20	88.2	33	6.6	0.66
Liquid	5	C	2	20	92.8	35	7	0.7
Liquid	5	C	3	20	103.3	39	7.8	0.78
Liquid	5	C	6	20	117.7	45	9	0.9
Liquid	5	C	9	20	122.3	46	9.2	0.92
Liquid	5	C	12	20	116.8	44	8.8	0.88
Liquid	5	C	24	20	117.4	44	8.8	0.88
Liquid	5	C	36	20	111.7	42	8.4	0.84
Liquid	5	C	48	20	108.6	41	8.2	0.82
Liquid	5	C	72	20	102.8	39	7.8	0.78
